# Supplementary material for: Maternal Serum, Cord and Human Milk Levels of Per- and Polyfluoroalkyl Substances (PFAS), Association with Predictors and Effect on Newborn Anthropometry
Source: MDPI journal article supplement (doi:10.3390/toxics11050455), 2023-05-14
Supplement: s1 [file s1]

**Maternal serum, cord and human milk levels of Per- and Polyfluoroalkyls (PFAS), association with predictors and effect on newborn anthropometry**

**Supplementary Material**

**Table of content**

| <b>Content</b>                                                                                                                                             | <b>Page</b> |
|------------------------------------------------------------------------------------------------------------------------------------------------------------|-------------|
| <b>Table S1.</b> PFAS maternal serum – human milk correlation (n=38)                                                                                       | S2          |
| <b>Table S2.</b> Characteristics of the study participants with regards to maternal total PFAS serum levels categories ( <i>n</i> = 269)                   | S2-3        |
| <b>Table S3.</b> Logistic regression for maternal serum PFHpA using backward method (N=269)                                                                | S4          |
| <b>Table S4.</b> Logistic regression for maternal serum PFOA using backward method (N=269)                                                                 | S4-5        |
| <b>Table S5.</b> Logistic regression for maternal serum PFHxS using backward method (N=269)                                                                | S5-6        |
| <b>Table S6.</b> Logistic regression for maternal serum PFOS using backward method (N=269)                                                                 | S6-7        |
| <b>Table S7.</b> Association between dietary intake, use of tap water, and PFAS human milk levels (n=35)                                                   | S8-9        |
| <b>Table S8.</b> Multivariate Linear Regression for Z-scores of newborns weight-for-length at birth with maternal serum $\Sigma$ PFAS as predictor (n=243) | S10         |
| <b>Table S9.</b> Multivariate Linear Regression for Z-scores of newborns weight-for-length at birth with maternal serum PFOA as predictor (n=243)          | S10-11      |
| <b>Table S10.</b> Multivariate Linear Regression for Z-scores of newborns weight-for-length at birth with maternal serum PFHxS as predictor (n=243)        | S11         |
| <b>Table S11.</b> Multivariate Linear Regression for Z-scores of newborns weight-for-length at birth with maternal serum PFOS as predictor (n=243)         | S12         |
| <b>Table S12.</b> Multivariate Linear Regression for Z scores of newborns anthropometric measurements at birth with PFHpA as predictor (n=243)             | S13-14      |
| <b>Table S13.</b> Multivariate Linear Regression for Z scores of newborns anthropometric measurements at birth with PFOA as predictor (n=243)              | S15-16      |
| <b>Table S14.</b> Multivariate Linear Regression for Z scores of newborns anthropometric measurements at birth with PFHxS as predictor (n=243)             | S17-18      |
| <b>Table S15.</b> Multivariate Linear Regression for Z scores of newborns anthropometric measurements at birth with PFOS as predictor (n=243)              | S19-20      |
| <b>Table S16.</b> Multivariate Linear Regression for Z scores of newborns anthropometric measurements at birth with $\Sigma$ PFAS as predictor (n=243)     | S21-22      |

**Table S1.** PFAS maternal serum – human milk correlation (n=38)

|                        | Maternal serum PFAS levels |                  |                 |                  |                 |
|------------------------|----------------------------|------------------|-----------------|------------------|-----------------|
|                        | $\Sigma$ PFAS<br>(ng/mL)   | PFHpA<br>(ng/mL) | PFOA<br>(ng/mL) | PFHxS<br>(ng/mL) | PFOS<br>(ng/mL) |
| Human milk PFAS levels |                            |                  |                 |                  |                 |
| $\Sigma$ PFAS (ng/L)   | 0.360*                     | 0.349*           | 0.364*          | 0.369*           | 0.356*          |
| PFHpA (ng/L)           | 0.349*                     | 0.336*           | 0.352*          | 0.357*           | 0.347*          |
| PFOA (ng/L)            | 0.348*                     | 0.337*           | 0.353*          | 0.357*           | 0.344*          |
| PFNA (ng/L)            | 0.369*                     | 0.356*           | 0.373*          | 0.377*           | 0.366*          |
| PFHxS (ng/L)           | 0.372*                     | 0.361*           | 0.377*          | 0.382*           | 0.368*          |
| PFOS (ng/L)            | 0.358*                     | 0.347*           | 0.363*          | 0.367*           | 0.354*          |

Statistical Test: Pearson correlation

\* correlation is significant at the 0.05 level (2-tailed)

**Table S2.** Characteristics of the study participants with regards to maternal total PFAS serum levels categories ( $n = 269$ )

|                                                     |                        | $\Sigma$ PFASs |       |       |       |                 |
|-----------------------------------------------------|------------------------|----------------|-------|-------|-------|-----------------|
|                                                     |                        | Low            |       | High  |       |                 |
|                                                     |                        | Count          | %     | Count | %     | <i>p</i> -value |
| Sociodemographic and other maternal characteristics |                        |                |       |       |       |                 |
| Region of Recruitment                               | Beirut / Mount-Lebanon | 61             | 35.9% | 37    | 37.4% | 0.000           |
|                                                     | Beqaa                  | 109            | 64.1% | 34    | 34.3% |                 |
|                                                     | Sidon/Nabatieh         | 0              | 0.0%  | 28    | 28.3% |                 |
| Age                                                 | 20-30 years            | 79             | 46.5% | 53    | 53.5% | 0.264           |
|                                                     | 30-40 years            | 91             | 53.5% | 46    | 46.5% |                 |
| Parity                                              | Primiparous            | 56             | 32.9% | 43    | 43.4% | 0.085           |
|                                                     | Multiparous            | 114            | 67.1% | 56    | 56.6% |                 |
| Education                                           | High school or less    | 78             | 45.9% | 29    | 29.3% | 0.007           |
|                                                     | University level       | 92             | 54.1% | 70    | 70.7% |                 |
| Crowding Index <sup>a</sup>                         | ≤1                     | 132            | 77.6% | 83    | 83.8% | 0.22            |
|                                                     | > 1                    | 38             | 22.4% | 16    | 16.2% |                 |
| Breastfed                                           | Yes                    | 152            | 90.5% | 86    | 90.5% | 0.989           |

|                                       |                        |     |       |    |       |       |
|---------------------------------------|------------------------|-----|-------|----|-------|-------|
|                                       | No                     | 16  | 9.5%  | 9  | 9.5%  |       |
| <b>Anthropometric characteristics</b> |                        |     |       |    |       |       |
| BMI                                   | < 25 kg/m <sup>2</sup> | 107 | 62.9% | 64 | 64.6% | 0.779 |
|                                       | ≥ 25 kg/m <sup>2</sup> | 63  | 37.1% | 35 | 35.4% |       |
| GWG <sup>b</sup>                      | Inadequate             | 61  | 35.9% | 29 | 29.3% | 0.519 |
|                                       | Adequate               | 52  | 30.6% | 35 | 35.4% |       |
|                                       | Excessive              | 57  | 33.5% | 35 | 35.4% |       |
| <b>Environmental characteristics</b>  |                        |     |       |    |       |       |
| Geographical vicinity to factories    | No                     | 90  | 54.5% | 58 | 58.6% | 0.522 |
|                                       | Yes                    | 75  | 45.5% | 41 | 41.4% |       |
| Geographical vicinity to landfills    | No                     | 85  | 50.0% | 45 | 45.5% | 0.472 |
|                                       | Yes                    | 85  | 50.0% | 54 | 54.5% |       |
| Illegal incineration                  | No                     | 87  | 51.2% | 35 | 35.4% | 0.012 |
|                                       | Yes                    | 83  | 48.8% | 64 | 64.6% |       |
| <b>Behavioral characteristics</b>     |                        |     |       |    |       |       |
| Passive smoking                       | No                     | 39  | 22.9% | 21 | 21.2% | 0.743 |
|                                       | Yes                    | 131 | 77.1% | 78 | 78.8% |       |
| Ever smoking                          | No                     | 95  | 55.9% | 59 | 59.6% | 0.553 |
|                                       | Yes                    | 75  | 44.1% | 40 | 40.4% |       |
| Alcohol consumption                   | Yes                    | 30  | 17.6% | 13 | 13.1% | 0.330 |
|                                       | No                     | 140 | 82.4% | 86 | 86.9% |       |
| <b>Dietary characteristics</b>        |                        |     |       |    |       |       |
| Fish/Shellfish                        | <0.63 portions/week    | 91  | 53.5% | 37 | 37.4% | 0.011 |
|                                       | ≥ 0.63 portions/week   | 79  | 46.5% | 62 | 62.6% |       |
| Red meat                              | <1.94 portions/week    | 93  | 54.7% | 41 | 41.4% | 0.035 |
|                                       | ≥ 1.94 portions/week   | 77  | 45.3% | 58 | 58.6% |       |
| Poultry                               | < 2 portions/week      | 82  | 48.2% | 40 | 40.4% | 0.213 |
|                                       | ≥ 2 portions/week      | 88  | 51.8% | 59 | 59.6% |       |
| Eggs                                  | <1.4 portions/week     | 88  | 52.1% | 45 | 45.9% | 0.332 |
|                                       | ≥ 1.4 portions/week    | 81  | 47.9% | 53 | 54.1% |       |
| Dairy Products                        | < 11.5 portions/week   | 78  | 45.9% | 50 | 50.5% | 0.464 |
|                                       | ≥ 11.5 portions/week   | 92  | 54.1% | 49 | 49.5% |       |
| Fruits                                | <10.5 portions/week    | 80  | 47.1% | 44 | 44.4% | 0.678 |
|                                       | ≥ 10.5 portions/week   | 90  | 52.9% | 55 | 55.6% |       |

SD: standard deviation; BMI: body mass index; GWG: gestational weight gain;

Statistical test: Chi-square;  $p < 0.05$  is significant;

<sup>a</sup>Crowding index was defined as the total number of co-residents per household, excluding the newborn infant, divided by the total number of rooms, excluding the kitchen and the bathrooms

<sup>b</sup>GWG was categorized based on the Institute of Medicine (IOM) guidelines (IOM and NRC, 2009)

**Table S3.** Logistic regression for maternal serum PFHpA using backward method (N=269)

|                                                                          | 95% CI          |      |      |          |
|--------------------------------------------------------------------------|-----------------|------|------|----------|
|                                                                          | OR <sup>b</sup> | LB   | UB   | p- value |
| PFHpA High vs Low <sup>a</sup>                                           |                 |      |      |          |
| Fish / Shellfish consumption ≥0.63 vs <0.63 portion/week <sup>c, d</sup> | 2.01            | 1.11 | 3.66 | 0.022    |
| Vicinity to illegal incinerations Yes vs No <sup>d</sup>                 | 1.88            | 1.00 | 3.53 | 0.048    |
| Education University level vs High school or less <sup>c</sup>           | 2.17            | 1.16 | 4.09 | 0.016    |
| Age ≥30 vs <30                                                           | 0.86            | 0.46 | 1.60 | 0.638    |
| Multiparous vs Primiparous                                               | 0.74            | 0.38 | 1.42 | 0.360    |
| Pre-pregnancy BMI ≥25 vs <25 kg/m <sup>2</sup>                           | 0.96            | 0.50 | 1.83 | 0.900    |
| GWG                                                                      |                 |      |      |          |
| Normal vs Inadequate                                                     | 1.13            | 0.56 | 2.29 | 0.739    |
| Excessive vs Inadequate                                                  | 0.96            | 0.46 | 2.04 | 2.04     |
| Crowding index ≥1 vs <1                                                  | 0.92            | 0.42 | 1.98 | 1.98     |
| Breastfed Yes vs No                                                      | 1.04            | 0.39 | 2.76 | 0.938    |
| Vicinity to factories Yes vs No                                          | 0.68            | 0.38 | 1.23 | 0.200    |
| Vicinity to landfills Yes vs No                                          | 1.10            | 0.58 | 2.08 | 0.778    |
| Ever smoking Yes vs No                                                   | 0.70            | 0.39 | 1.29 | 0.255    |
| Passive smoking Yes vs No                                                | 1.56            | 0.77 | 3.18 | 0.215    |
| Alcohol Yes vs No                                                        | 0.43            | 0.18 | 1.03 | 0.058    |
| Red meat consumption ≥ 1.94 vs <1.94 portions/week                       | 1.56            | 0.88 | 2.76 | 0.125    |
| Dairy products consumption ≥11.5 vs <11.5 portions/week                  | 0.74            | 0.41 | 1.32 | 0.302    |
| Poultry consumption ≥ 2 vs <2 portions/week                              | 1.22            | 0.69 | 2.16 | 0.491    |
| Eggs consumption ≥1.4 vs <1.4 portions/week                              | 0.93            | 0.52 | 1.67 | 0.814    |
| Fruits consumption ≥10.5 vs <10.5 portions/week                          | 1.13            | 0.63 | 2.02 | 0.682    |

BMI: body mass index; GWG: gestational weight gain; CI: confidence interval; OR: Odds Ratio; LB: lower bound; UB: upper bound

Test: Logistic regression;  $p \leq 0.05$  was considered significant

<sup>a</sup>Threshold of PFHpA was determined according to distribution

<sup>b</sup>Variables entered as predictors were age, parity, pre-pregnancy BMI, GWG, crowding index, education, having been breastfed, geographical vicinity to landfills, geographical vicinity to factories, illegal incinerations, smoking, passive smoking, alcohol consumption, fish / shellfish consumption, red meat consumption, poultry consumption, dairy products consumption, eggs consumption, and fruits consumption

<sup>c</sup> p-interaction (fish/shellfish consumption x education) = 0.468

<sup>d</sup> p-interaction (fish/shellfish consumption x vicinity to illegal incineration) = 0.346

**Table S4.** Logistic regression for maternal serum PFOA using backward method (N=269)

|                                                                         | 95% CI          |      |      |          |
|-------------------------------------------------------------------------|-----------------|------|------|----------|
|                                                                         | OR <sup>b</sup> | LB   | UB   | p- value |
| PFOA High vs Low <sup>a</sup>                                           |                 |      |      |          |
| Fish / Shellfish consumption ≥0.63 vs <0.63 portion/week <sup>c,d</sup> | 2.05            | 1.13 | 3.72 | 0.019    |
| Vicinity to illegal incinerations Yes vs No <sup>d</sup>                | 1.92            | 1.02 | 3.60 | 0.043    |

|                                                                |      |      |      |       |
|----------------------------------------------------------------|------|------|------|-------|
| Education University level vs High school or less <sup>c</sup> | 2.22 | 1.18 | 4.18 | 0.014 |
| Age ≥30 vs <30                                                 | 0.83 | 0.44 | 1.54 | 0.552 |
| Multiparous vs Primiparous                                     | 0.71 | 0.37 | 1.37 | 0.310 |
| Pre-pregnancy BMI ≥25 vs <25 kg/m <sup>2</sup>                 | 0.91 | 0.48 | 1.73 | 0.770 |
| GWG                                                            |      |      |      |       |
| Normal vs Inadequate                                           | 1.12 | 0.55 | 2.29 | 0.752 |
| Excessive vs Inadequate                                        | 1.04 | 0.49 | 2.21 | 0.917 |
| Crowding index ≥1 vs <1                                        | 0.92 | 0.42 | 1.99 | 0.823 |
| Breastfed Yes vs No                                            | 1.05 | 0.39 | 2.80 | 0.921 |
| Vicinity to factories Yes vs No                                | 0.70 | 0.39 | 1.26 | 0.237 |
| Vicinity to landfills Yes vs No                                | 1.13 | 0.59 | 2.13 | 0.718 |
| Ever smoking Yes vs No                                         | 0.71 | 0.39 | 1.30 | 0.262 |
| Passive smoking Yes vs No                                      | 1.44 | 0.71 | 2.90 | 0.315 |
| Alcohol Yes vs No                                              | 0.42 | 0.18 | 1.01 | 0.052 |
| Red meat consumption ≥ 1.94 vs <1.94 portions/week             | 1.59 | 0.90 | 2.81 | 0.111 |
| Dairy products consumption ≥11.5 vs <11.5 portions/week        | 0.76 | 0.43 | 1.37 | 0.365 |
| Poultry consumption ≥ 2 vs <2 portions/week                    | 1.23 | 0.70 | 2.19 | 0.473 |
| Eggs consumption ≥1.4 vs <1.4 portions/week                    | 0.95 | 0.53 | 1.71 | 0.874 |
| Fruits consumption ≥10.5 vs <10.5 portions/week                | 1.16 | 0.65 | 2.09 | 0.610 |

BMI: body mass index; GWG: gestational weight gain; CI: confidence interval; OR: Odds Ratio; LB: lower bound; UB: upper bound

Test: Logistic regression;  $p \leq 0.05$  was considered significant

<sup>a</sup>Threshold of PFOA was determined according to distribution

<sup>b</sup>Variables entered as predictors were age, parity, pre-pregnancy BMI, GWG, crowding index, education, having been breastfed, geographical vicinity to landfills, geographical vicinity to factories, illegal incinerations, smoking, passive smoking, alcohol consumption, fish / shellfish consumption, red meat consumption, poultry consumption, dairy products consumption, eggs consumption, and fruits consumption

<sup>c</sup> p-interaction (fish/shellfish consumption x education) = 0.946

<sup>d</sup> p-interaction (fish/shellfish consumption x vicinity to illegal incineration) = 0.593

**Table S5.** Logistic regression for maternal serum PFHxS using backward method (N=269)

|                                                                         | 95% CI          |      |      |          |
|-------------------------------------------------------------------------|-----------------|------|------|----------|
|                                                                         | OR <sup>b</sup> | LB   | UB   | p- value |
| <b>PFHxS High vs Low<sup>a</sup></b>                                    |                 |      |      |          |
| Fish / Shellfish consumption ≥0.63 vs <0.63 portion/week <sup>c,d</sup> | 1.84            | 1.02 | 3.31 | 0.042    |
| Vicinity to illegal incinerations Yes vs No <sup>d</sup>                | 1.87            | 1.00 | 3.46 | 0.048    |
| Education University level vs High school or less <sup>c</sup>          | 2.13            | 1.14 | 3.98 | 0.017    |
| Age ≥30 vs <30                                                          | 0.84            | 0.46 | 1.55 | 0.583    |
| Multiparous vs Primiparous                                              | 0.75            | 0.39 | 1.44 | 0.390    |
| Pre-pregnancy BMI ≥25 vs <25 kg/m <sup>2</sup>                          | 1.08            | 0.58 | 2.04 | 0.803    |
| GWG                                                                     |                 |      |      |          |
| Normal vs Inadequate                                                    | 1.12            | 0.56 | 2.26 | 0.748    |
| Excessive vs Inadequate                                                 | 0.94            | 0.45 | 1.97 | 0.868    |

|                                                                  |      |      |      |       |
|------------------------------------------------------------------|------|------|------|-------|
| Crowding index $\geq 1$ vs $< 1$                                 | 0.98 | 0.46 | 2.09 | 0.955 |
| Breastfed Yes vs No                                              | 0.93 | 0.35 | 2.43 | 0.880 |
| Vicinity to factories Yes vs No                                  | 0.71 | 0.40 | 1.27 | 0.248 |
| Vicinity to landfills Yes vs No                                  | 1.00 | 0.53 | 1.88 | 0.998 |
| Ever smoking Yes vs No                                           | 0.84 | 0.46 | 1.52 | 0.558 |
| Passive smoking Yes vs No                                        | 1.46 | 0.73 | 2.94 | 0.285 |
| Alcohol Yes vs No                                                | 0.47 | 0.20 | 1.10 | 0.081 |
| Red meat consumption $\geq 1.94$ vs $< 1.94$ portions/week       | 1.61 | 0.92 | 2.83 | 0.094 |
| Dairy products consumption $\geq 11.5$ vs $< 11.5$ portions/week | 0.72 | 0.40 | 1.27 | 0.256 |
| Poultry consumption $\geq 2$ vs $< 2$ portions/week              | 1.43 | 0.81 | 2.51 | 0.217 |
| Eggs consumption $\geq 1.4$ vs $< 1.4$ portions/week             | 0.80 | 0.45 | 1.43 | 0.460 |
| Fruits consumption $\geq 10.5$ vs $< 10.5$ portions/week         | 1.18 | 0.66 | 2.10 | 0.575 |

BMI: body mass index; GWG: gestational weight gain; CI: confidence interval; OR: Odds Ratio; LB: lower bound; UB: upper bound

Test: Logistic regression;  $p \leq 0.05$  was considered significant

<sup>a</sup>Threshold of PFHxS was determined according to distribution

<sup>b</sup>Variables entered as predictors were age, parity, pre-pregnancy BMI, GWG, crowding index, education, having been breastfed, geographical vicinity to landfills, geographical vicinity to factories, illegal incinerations, smoking, passive smoking, alcohol consumption, fish / shellfish consumption, red meat consumption, poultry consumption, dairy products consumption, eggs consumption, and fruits consumption

<sup>c</sup> p-interaction (fish/shellfish consumption x education) = 0.925

<sup>d</sup> p-interaction (fish/shellfish consumption x vicinity to illegal incineration) = 0.576

**Table S6.** Logistic regression for maternal serum PFOS using backward method (N=269)

|                                                                         | 95% CI          |      |      |          |
|-------------------------------------------------------------------------|-----------------|------|------|----------|
|                                                                         | OR <sup>b</sup> | LB   | UB   | p- value |
| PFOS High vs Low <sup>a</sup>                                           |                 |      |      |          |
| Fish / Shellfish consumption ≥0.63 vs <0.63 portion/week <sup>c,d</sup> | 1.90            | 1.05 | 3.46 | 0.034    |
| Vicinity to illegal incinerations Yes vs No <sup>d</sup>                | 2.03            | 1.08 | 3.81 | 0.029    |
| Education University level vs High school or less <sup>c</sup>          | 2.07            | 1.10 | 3.89 | 0.025    |
| Age ≥30 vs <30                                                          | 0.85            | 0.46 | 1.58 | 0.613    |
| Multiparous vs Primiparous                                              | 0.70            | 0.36 | 1.36 | 0.293    |
| Pre-pregnancy BMI ≥25 vs <25 kg/m <sup>2</sup>                          | 0.98            | 0.51 | 1.86 | 0.944    |
| GWG                                                                     |                 |      |      |          |
| Normal vs Inadequate                                                    | 1.19            | 0.59 | 2.42 | 0.630    |
| Excessive vs Inadequate                                                 | 1.01            | 0.48 | 2.14 | 0.983    |
| Crowding index ≥1 vs <1                                                 | 0.96            | 0.45 | 2.09 | 0.927    |
| Breastfed Yes vs No                                                     | 1.02            | 0.38 | 2.70 | 0.971    |
| Vicinity to factories Yes vs No                                         | 0.71            | 0.39 | 1.28 | 0.256    |
| Vicinity to landfills Yes vs No                                         | 1.00            | 0.53 | 1.90 | 0.994    |
| Ever smoking Yes vs No                                                  | 0.72            | 0.40 | 1.32 | 0.292    |
| Passive smoking Yes vs No                                               | 1.51            | 0.74 | 3.06 | 0.255    |
| Alcohol Yes vs No                                                       | 0.44            | 0.19 | 1.06 | 0.067    |
| Red meat consumption ≥ 1.94 vs <1.94 portions/week                      | 1.60            | 0.91 | 2.83 | 0.105    |

|                                                                  |      |      |      |       |
|------------------------------------------------------------------|------|------|------|-------|
| Dairy products consumption $\geq 11.5$ vs $< 11.5$ portions/week | 0.72 | 0.40 | 1.29 | 0.274 |
| Poultry consumption $\geq 2$ vs $< 2$ portions/week              | 1.26 | 0.71 | 2.24 | 0.422 |
| Eggs consumption $\geq 1.4$ vs $< 1.4$ portions/week             | 0.99 | 0.55 | 1.78 | 0.977 |
| Fruits consumption $\geq 10.5$ vs $< 10.5$ portions/week         | 1.10 | 0.61 | 1.97 | 0.746 |

BMI: body mass index; GWG: gestational weight gain; CI: confidence interval; OR: Odds Ratio; LB: lower bound; UB: upper bound

Test: Logistic regression;  $p \leq 0.05$  was considered significant

<sup>a</sup>Threshold of PFOS was determined according to distribution

<sup>b</sup>Variables entered as predictors were age, parity, pre-pregnancy BMI, GWG, crowding index, education, having been breastfed, geographical vicinity to landfills, geographical vicinity to factories, illegal incinerations, smoking, passive smoking, alcohol consumption, fish / shellfish consumption, red meat consumption, poultry consumption, dairy products consumption, eggs consumption, and fruits consumption

<sup>c</sup> p-interaction (fish/shellfish consumption x education) = 0.984

<sup>d</sup> p-interaction (fish/shellfish consumption x vicinity to illegal incineration) = 0.569

**Table S7.** Association between dietary intake, use of tap water, and PFAS human milk levels  
(n=35)

| PFAS Categories     |                                |                    |        |                     |       |                      |
|---------------------|--------------------------------|--------------------|--------|---------------------|-------|----------------------|
|                     |                                | Low (n=18)<br>N; % |        | High (n=21)<br>N; % |       | p-Value <sup>a</sup> |
| ΣPFAS               |                                |                    |        |                     |       |                      |
| Dairy Products      | <1.5portions/day               | 14                 | 77.8%  | 8                   | 38.1% | 0.013                |
|                     | ≥1.5portions/day               | 4                  | 22.2%  | 13                  | 61.9% |                      |
| Eggs <sup>b</sup>   | <1.68 portion/week<br>(Median) | 13                 | 72.2%  | 6                   | 28.6% | 0.007                |
|                     | >1.68 portion/week<br>(Median) | 5                  | 27.8%  | 15                  | 71.4% |                      |
| Use of Tap<br>Water | Yes                            | 0                  | 0.0%   | 5                   | 27.8% | 0.019                |
|                     | No                             | 17                 | 100.0% | 13                  | 72.2% |                      |
| PFHpA               |                                |                    |        |                     |       |                      |
| Dairy Products      | <1.5portions/day               | 14                 | 77.8%  | 8                   | 38.1% | 0.013                |
|                     | ≥1.5portions/day               | 4                  | 22.2%  | 13                  | 61.9% |                      |
| Eggs <sup>b</sup>   | <1.68 portion/week<br>(Median) | 13                 | 72.2%  | 6                   | 28.6% | 0.007                |
|                     | >1.68 portion/week<br>(Median) | 5                  | 27.8%  | 15                  | 71.4% |                      |
| Use of Tap<br>Water | Yes                            | 0                  | 0.0%   | 5                   | 27.8% | 0.019                |
|                     | No                             | 17                 | 100.0% | 13                  | 72.2% |                      |
| PFOA                |                                |                    |        |                     |       |                      |
| Dairy Products      | <1.5portions/day               | 14                 | 77.8%  | 8                   | 38.1% | 0.013                |
|                     | ≥1.5portions/day               | 4                  | 22.2%  | 13                  | 61.9% |                      |
| Eggs <sup>b</sup>   | <1.68 portion/week<br>(Median) | 13                 | 72.2%  | 6                   | 28.6% | 0.007                |
|                     | >1.68 portion/week<br>(Median) | 5                  | 27.8%  | 15                  | 71.4% |                      |
| Tap Water           | Yes                            | 0                  | 0.0%   | 5                   | 27.8% | 0.019                |
|                     | No                             | 17                 | 100.0% | 13                  | 72.2% |                      |
| PFNA                |                                |                    |        |                     |       |                      |
| Dairy Products      | <1.5portions/day               | 14                 | 77.8%  | 8                   | 38.1% | 0.013                |
|                     | ≥1.5portions/day               | 4                  | 22.2%  | 13                  | 61.9% |                      |



|                   |                                |    |        |    |       |       |
|-------------------|--------------------------------|----|--------|----|-------|-------|
| Eggs <sup>b</sup> | <1.68 portion/week<br>(Median) | 13 | 72.2%  | 6  | 28.6% | 0.007 |
|                   | >1.68 portion/week<br>(Median) | 5  | 27.8%  | 15 | 71.4% |       |
| Tap Water         | Yes                            | 0  | 0.0%   | 5  | 27.8% | 0.019 |
|                   | No                             | 17 | 100.0% | 13 | 72.2% |       |

### PFHxS

|                   |                                |    |        |    |       |       |
|-------------------|--------------------------------|----|--------|----|-------|-------|
| Dairy Products    | <1.5portions/day               | 14 | 77.8%  | 8  | 38.1% | 0.013 |
|                   | ≥1.5portions/day               | 4  | 22.2%  | 13 | 61.9% |       |
| Eggs <sup>b</sup> | <1.68 portion/week<br>(Median) | 13 | 72.2%  | 6  | 28.6% | 0.007 |
|                   | >1.68 portion/week<br>(Median) | 5  | 27.8%  | 15 | 71.4% |       |
| Tap Water         | Yes                            | 0  | 0.0%   | 5  | 27.8% | 0.019 |
|                   | No                             | 17 | 100.0% | 13 | 72.2% |       |

### PFOS

|                   |                                |    |        |    |       |       |
|-------------------|--------------------------------|----|--------|----|-------|-------|
| Dairy Products    | <1.5portions/day               | 14 | 77.8%  | 8  | 38.1% | 0.013 |
|                   | ≥1.5portions/day               | 4  | 22.2%  | 13 | 61.9% |       |
| Eggs <sup>b</sup> | <1.68 portion/week<br>(Median) | 13 | 72.2%  | 6  | 28.6% | 0.007 |
|                   | >1.68 portion/week<br>(Median) | 5  | 27.8%  | 15 | 71.4% |       |
| Tap Water         | Yes                            | 0  | 0.0%   | 5  | 27.8% | 0.019 |
|                   | No                             | 17 | 100.0% | 13 | 72.2% |       |

<sup>a</sup> statistical test: Chi-square

<sup>b</sup> significant in non-parametric test, p for all PFAS is 0.013

p ≤ 0.05 was considered significant

**Table S8.** Multivariate Linear Regression for Z-scores of newborns weight-for-length at birth with maternal serum  $\Sigma$ PFAS as predictor (n=243)

|                                                           | 95% CI          |        |       |                 |
|-----------------------------------------------------------|-----------------|--------|-------|-----------------|
|                                                           | Unst. $\beta^b$ | LB     | UB    | <i>p</i> -value |
| Weight-for-length                                         |                 |        |       |                 |
| $\Sigma$ PFAS High vs Low <sup>a</sup>                    | -0.034          | -0.069 | 0.001 | 0.057           |
| Age $\geq 30$ vs $<30$ years                              | -0.008          | -0.043 | 0.027 | 0.656           |
| Multiparous vs Primiparous                                | 0.015           | -0.024 | 0.054 | 0.459           |
| Pre-pregnancy BMI $\geq 25$ vs $<25$ kg/m <sup>2</sup>    | -0.030          | -0.067 | 0.008 | 0.125           |
| GWG                                                       | 0.011           | -0.011 | 0.032 | 0.325           |
| Pregnancy weight loss from restrictive diet Yes vs No     | 0.028           | -0.050 | 0.107 | 0.480           |
| Pre-pregnancy weight loss from restrictive diet Yes vs No | -0.007          | -0.051 | 0.036 | 0.739           |
| Passive smoking Yes vs No                                 | 0.0004          | -0.041 | 0.042 | 0.985           |
| Smoking Yes vs Non                                        | 0.006           | -0.029 | 0.041 | 0.735           |
| Gestational age (In weeks)                                | 0.010           | -0.003 | 0.023 | 0.125           |
| Crowding index $>1$ vs $\leq 1$                           | -0.035          | -0.080 | 0.011 | 0.132           |
| Education University vs High school or less               | 0.038           | 0.001  | 0.075 | 0.042           |

BMI : Body mass index; Unst.  $\beta$ : Unstandardized Beta; CI: Confidence Interval; LB: Lower Bound; UB: Upper Bound; GWG: Gestational Weight Gain

Test: Linear Regression;  $p \leq 0.05$  was considered significant

<sup>a</sup>Threshold was determined according to distribution

<sup>b</sup>Variables included as predictors were age, parity, Pre-pregnancy BMI, GWG, Pre-pregnancy and Pregnancy weight loss from restrictive diet, crowding index, education, smoking, and passive smoking

**Table S9.** Multivariate Linear Regression for Z-scores of newborns weight-for-length at birth with maternal serum PFOA as predictor (n=243)

|                                                           | 95% CI          |        |       |                 |
|-----------------------------------------------------------|-----------------|--------|-------|-----------------|
|                                                           | Unst. $\beta^b$ | LB     | UB    | <i>p</i> -value |
| <b>Weight-for-length</b>                                  |                 |        |       |                 |
| PFOA High vs Low <sup>a</sup>                             | -0.033          | -0.068 | 0.002 | 0.065           |
| Age $\geq 30$ vs $<30$ years                              | -0.008          | -0.043 | 0.027 | 0.656           |
| Multiparous vs Primiparous                                | 0.015           | -0.025 | 0.054 | 0.463           |
| Pre-pregnancy BMI $\geq 25$ vs $<25$ kg/m <sup>2</sup>    | -0.030          | -0.068 | 0.008 | 0.119           |
| GWG                                                       | 0.011           | -0.011 | 0.033 | 0.323           |
| Pregnancy weight loss from restrictive diet Yes vs No     | 0.028           | -0.050 | 0.107 | 0.481           |
| Pre-pregnancy weight loss from restrictive diet Yes vs No | -0.007          | -0.050 | 0.037 | 0.763           |
| Passive smoking Yes vs No                                 | 0.000           | -0.041 | 0.041 | 0.995           |

|                                             |        |        |       |       |
|---------------------------------------------|--------|--------|-------|-------|
| Smoking Yes vs Non                          | 0.006  | -0.030 | 0.041 | 0.756 |
| Gestational age (In weeks)                  | 0.010  | -0.003 | 0.023 | 0.135 |
| Crowding index >1 vs ≤1                     | -0.035 | -0.080 | 0.010 | 0.130 |
| Education University vs High school or less | 0.039  | 0.002  | 0.076 | 0.041 |

BMI : Body mass index; Unst.  $\beta$ : Unstandardized Beta; CI: Confidence Interval; LB: Lower Bound; UB: Upper Bound; GWG: Gestational Weight Gain

Test: Linear Regression;  $p \leq 0.05$  was considered significant

<sup>a</sup>Threshold was determined according to distribution

<sup>b</sup>Variables included as predictors were age, parity, Pre-pregnancy BMI, GWG, Pre-pregnancy and Pregnancy weight loss from restrictive diet, crowding index, education, smoking, and passive smoking

**Table S10.** Multivariate Linear Regression for Z-scores of newborns weight-for-length at birth with maternal serum PFHxS as predictor (n=243)

|                                                           | 95% CI          |        |       |                 |
|-----------------------------------------------------------|-----------------|--------|-------|-----------------|
|                                                           | Unst. $\beta^b$ | LB     | UB    | <i>p</i> -value |
| <b>Weight-for-length</b>                                  |                 |        |       |                 |
| PFHxS High vs Low <sup>a</sup>                            | -0.032          | -0.067 | 0.003 | 0.071           |
| Age $\geq 30$ vs $< 30$ years                             | -0.008          | -0.043 | 0.027 | 0.653           |
| Multiparous vs Primiparous                                | 0.015           | -0.024 | 0.054 | 0.450           |
| Pre-pregnancy BMI $\geq 25$ vs $< 25$ kg/m <sup>2</sup>   | -0.029          | -0.067 | 0.009 | 0.128           |
| GWG                                                       | 0.011           | -0.011 | 0.033 | 0.319           |
| Pregnancy weight loss from restrictive diet Yes vs No     | 0.028           | -0.050 | 0.107 | 0.478           |
| Pre-pregnancy weight loss from restrictive diet Yes vs No | -0.008          | -0.051 | 0.036 | 0.731           |
| Passive smoking Yes vs No                                 | 0.00003         | -0.041 | 0.041 | 0.999           |
| Smoking Yes vs Non                                        | 0.007           | -0.028 | 0.042 | 0.700           |
| Gestational age (In weeks)                                | 0.010           | -0.003 | 0.023 | 0.128           |
| Crowding index $> 1$ vs $\leq 1$                          | -0.034          | -0.079 | 0.011 | 0.137           |
| Education University vs High school or less               | 0.039           | 0.002  | 0.076 | 0.041           |

BMI : Body mass index; Unst.  $\beta$ : Unstandardized Beta; CI: Confidence Interval; LB: Lower Bound; UB: Upper Bound; GWG: Gestational Weight Gain

Test: Linear Regression;  $p \leq 0.05$  was considered significant

<sup>a</sup>Threshold was determined according to distribution

<sup>b</sup>Variables included as predictors were age, parity, Pre-pregnancy BMI, GWG, Pre-pregnancy and Pregnancy weight loss from restrictive diet, crowding index, education, smoking, and passive smoking

**Table S11.** Multivariate Linear Regression for Z-scores of newborns weight-for-length at birth with maternal serum PFOS as predictor (n=243)

|                                                           | 95% CI          |        |       |                 |
|-----------------------------------------------------------|-----------------|--------|-------|-----------------|
|                                                           | Unst. $\beta^b$ | LB     | UB    | <i>p</i> -value |
| <b>Weight-for-length</b>                                  |                 |        |       |                 |
| PFOS High vs Low <sup>a</sup>                             | -0.034          | -0.069 | 0.001 | 0.057           |
| Age $\geq 30$ vs $< 30$ years                             | -0.008          | -0.043 | 0.027 | 0.656           |
| Multiparous vs Primiparous                                | 0.015           | -0.024 | 0.054 | 0.459           |
| Pre-pregnancy BMI $\geq 25$ vs $< 25$ kg/m <sup>2</sup>   | -0.030          | -0.067 | 0.008 | 0.125           |
| GWG                                                       | 0.011           | -0.011 | 0.032 | 0.325           |
| Pregnancy weight loss from restrictive diet Yes vs No     | 0.028           | -0.050 | 0.107 | 0.480           |
| Pre-pregnancy weight loss from restrictive diet Yes vs No | -0.007          | -0.051 | 0.036 | 0.739           |
| Passive smoking Yes vs No                                 | 0.000           | -0.041 | 0.042 | 0.985           |
| Smoking Yes vs Non                                        | 0.006           | -0.029 | 0.041 | 0.735           |
| Gestational age (In weeks)                                | 0.010           | -0.003 | 0.023 | 0.125           |
| Crowding index $> 1$ vs $\leq 1$                          | -0.035          | -0.080 | 0.011 | 0.132           |
| Education University vs High school or less               | 0.038           | 0.001  | 0.075 | 0.042           |

BMI : Body mass index; Unst.  $\beta$ : Unstandardized Beta; CI: Confidence Interval; LB: Lower Bound; UB: Upper Bound; GWG: Gestational Weight Gain

Test: Linear Regression;  $p \leq 0.05$  was considered significant

<sup>a</sup>Threshold was determined according to distribution

<sup>b</sup>Variables included as predictors were age, parity, Pre-pregnancy BMI, GWG, Pre-pregnancy and Pregnancy weight loss from restrictive diet, crowding index, education, smoking, and passive smoking

**Table S12.** Multivariate Linear Regression for Z scores of newborns anthropometric measurements at birth with PFHpA as predictor (n=243)

|                                                           | CI 95%        |             |        |       |                 |
|-----------------------------------------------------------|---------------|-------------|--------|-------|-----------------|
|                                                           | Unst. $\beta$ | St. $\beta$ | LB     | UB    | <i>p</i> -value |
| <b>Weight-for-age</b>                                     |               |             |        |       |                 |
| PFHpA High vs Low <sup>a</sup>                            | -0.007        | -0.026      | -0.042 | 0.027 | 0.677           |
| Age $\geq 30$ vs $< 30$ years                             | 0.016         | 0.059       | -0.019 | 0.051 | 0.367           |
| Multiparous vs Primiparous                                | 0.015         | 0.054       | -0.024 | 0.054 | 0.449           |
| Pre-pregnancy BMI $\geq 25$ vs $< 25$ kg/m <sup>2</sup>   | -0.006        | -0.023      | -0.043 | 0.031 | 0.737           |
| GWG <sup>c</sup>                                          | 0.022         | 0.135       | 0.001  | 0.043 | 0.043           |
| Pregnancy weight loss from restrictive diet Yes vs No     | 0.032         | 0.054       | -0.045 | 0.109 | 0.411           |
| Pre-pregnancy weight loss from restrictive diet Yes vs No | 0.001         | 0.003       | -0.042 | 0.044 | 0.959           |
| Passive smoking Yes vs No                                 | 0.002         | 0.008       | -0.038 | 0.043 | 0.905           |
| Smoking Yes vs Non                                        | -0.012        | -0.044      | -0.047 | 0.023 | 0.506           |
| Gestational age (In weeks)                                | 0.022         | 0.216       | 0.009  | 0.035 | 0.001           |
| Crowding index $> 1$ vs $\leq 1$                          | -0.021        | -0.062      | -0.065 | 0.023 | 0.344           |
| Education University vs High school or less               | 0.021         | 0.078       | -0.015 | 0.058 | 0.250           |
| <b>Length-for-age</b>                                     |               |             |        |       |                 |
| PFHpA High vs Low <sup>a</sup>                            | -0.009        | -0.051      | -0.032 | 0.015 | 0.467           |
| Age $\geq 30$ vs $< 30$ years                             | 0.016         | 0.100       | -0.007 | 0.040 | 0.177           |
| Multiparous vs Primiparous                                | 0.011         | 0.067       | -0.015 | 0.037 | 0.398           |
| Pre-pregnancy BMI $\geq 25$ vs $< 25$ kg/m <sup>2</sup>   | -0.005        | -0.027      | -0.030 | 0.021 | 0.726           |
| GWG <sup>c</sup>                                          | -0.002        | -0.020      | -0.017 | 0.013 | 0.788           |
| Pregnancy weight loss from restrictive diet Yes vs No     | -0.009        | -0.026      | -0.060 | 0.042 | 0.730           |
| Pre-pregnancy weight loss from restrictive diet Yes vs No | 0.016         | 0.082       | -0.013 | 0.046 | 0.279           |
| Passive smoking Yes vs No                                 | 0.020         | 0.100       | -0.008 | 0.047 | 0.155           |
| Smoking Yes vs Non                                        | 0.001         | 0.006       | -0.022 | 0.024 | 0.938           |
| Gestational age (In weeks)                                | 0.001         | 0.011       | -0.010 | 0.011 | 0.876           |
| Crowding index $> 1$ vs $\leq 1$                          | -0.002        | -0.007      | -0.032 | 0.029 | 0.918           |
| Education University vs High school or less               | -0.003        | -0.015      | -0.027 | 0.022 | 0.834           |
| <b>Head circumference-for-age</b>                         |               |             |        |       |                 |
| PFHpA High vs Low <sup>a</sup>                            | -0.0005       | -0.005      | -0.014 | 0.013 | 0.944           |
| Age $\geq 30$ vs $< 30$ years                             | 0.009         | 0.095       | -0.005 | 0.022 | 0.196           |
| Multiparous vs Primiparous                                | 0.022         | 0.231       | 0.007  | 0.037 | 0.004           |

|                                                           |        |        |        |       |       |
|-----------------------------------------------------------|--------|--------|--------|-------|-------|
| Pre-pregnancy BMI $\geq 25$ vs $< 25$ kg/m <sup>2</sup>   | 0.008  | 0.084  | -0.007 | 0.023 | 0.278 |
| GWG <sup>c</sup>                                          | -0.002 | -0.034 | -0.010 | 0.007 | 0.657 |
| Pregnancy weight loss from restrictive diet Yes vs No     | 0.008  | 0.044  | -0.020 | 0.037 | 0.558 |
| Pre-pregnancy weight loss from restrictive diet Yes vs No | -0.009 | -0.080 | -0.026 | 0.008 | 0.298 |
| Passive smoking Yes vs No                                 | 0.009  | 0.078  | -0.007 | 0.024 | 0.263 |
| Smoking Yes vs Non                                        | -0.004 | -0.044 | -0.017 | 0.009 | 0.529 |
| Gestational age (In weeks)                                | 0.009  | 0.215  | 0.003  | 0.015 | 0.004 |
| Crowding index $> 1$ vs $\leq 1$                          | -0.015 | -0.127 | -0.032 | 0.002 | 0.081 |
| Education University vs High school or less               | 0.013  | 0.136  | -0.001 | 0.027 | 0.066 |

BMI : Body mass index; Unst.  $\beta$ : Unstandardized Beta; St.  $\beta$ : Standardized Beta; CI: Confidence Interval; LB: Lower Bound; UB: Upper Bound; GWG: Gestational Weight Gain

Test: Linear Regression;  $p \leq 0.05$  was considered significant

<sup>a</sup>Cut-offs of PFHpA were determined according to distribution

<sup>b</sup>Variables included as predictors were age, parity, Pre-pregnancy BMI, GWG, Pre-pregnancy and Pregnancy weight loss from restrictive diet, crowding index, education, smoking, and passive smoking

<sup>c</sup>GWG was categorized according to Institute of Medicine recommendations (IOM) (IOM and NRC, 2009)

**Table S13.** Multivariate Linear Regression for Z scores of newborns anthropometric measurements at birth with PFOA as predictor (n=243)

|                                                           | CI 95%        |             |        |       |                 |
|-----------------------------------------------------------|---------------|-------------|--------|-------|-----------------|
|                                                           | Unst. $\beta$ | St. $\beta$ | LB     | UB    | <i>p</i> -value |
| <b>Weight-for-age</b>                                     |               |             |        |       |                 |
| PFOA High vs Low <sup>a</sup>                             | -0.010        | -0.038      | -0.045 | 0.024 | 0.553           |
| Age $\geq 30$ vs <30 years                                | 0.016         | 0.058       | -0.019 | 0.050 | 0.374           |
| Multiparous vs Primiparous                                | 0.015         | 0.053       | -0.024 | 0.054 | 0.456           |
| Pre-pregnancy BMI $\geq 25$ vs <25 kg/m <sup>2</sup>      | -0.006        | -0.023      | -0.043 | 0.031 | 0.732           |
| GWG <sup>c</sup>                                          | 0.022         | 0.136       | 0.001  | 0.043 | 0.042           |
| Pregnancy weight loss from restrictive diet Yes vs No     | 0.031         | 0.052       | -0.047 | 0.108 | 0.434           |
| Pre-pregnancy weight loss from restrictive diet Yes vs No | 0.002         | 0.005       | -0.041 | 0.044 | 0.944           |
| Passive smoking Yes vs No                                 | 0.002         | 0.008       | -0.038 | 0.043 | 0.906           |
| Smoking Yes vs Non                                        | -0.012        | -0.044      | -0.047 | 0.023 | 0.502           |
| Gestational age (In weeks)                                | 0.022         | 0.216       | 0.009  | 0.035 | 0.001           |
| Crowding index >1 vs $\leq 1$                             | -0.021        | -0.063      | -0.065 | 0.023 | 0.340           |
| Education University vs High school or less               | 0.022         | 0.080       | -0.015 | 0.058 | 0.239           |
| <b>Length-for-age</b>                                     |               |             |        |       |                 |
| PFOA High vs Low <sup>a</sup>                             | -0.010        | -0.059      | -0.033 | 0.013 | 0.402           |
| Age $\geq 30$ vs <30 years                                | 0.016         | 0.098       | -0.008 | 0.040 | 0.184           |
| Multiparous vs Primiparous                                | 0.011         | 0.066       | -0.015 | 0.037 | 0.405           |
| Pre-pregnancy BMI $\geq 25$ vs <25 kg/m <sup>2</sup>      | -0.005        | -0.027      | -0.030 | 0.021 | 0.721           |
| GWG <sup>c</sup>                                          | -0.002        | -0.019      | -0.016 | 0.013 | 0.806           |
| Pregnancy weight loss from restrictive diet Yes vs No     | -0.010        | -0.027      | -0.061 | 0.041 | 0.712           |
| Pre-pregnancy weight loss from restrictive diet Yes vs No | 0.016         | 0.083       | -0.013 | 0.046 | 0.275           |
| Passive smoking Yes vs No                                 | 0.020         | 0.100       | -0.007 | 0.047 | 0.154           |
| Smoking Yes vs Non                                        | 0.001         | 0.005       | -0.022 | 0.024 | 0.942           |
| Gestational age (In weeks)                                | 0.001         | 0.010       | -0.010 | 0.011 | 0.893           |
| Crowding index >1 vs $\leq 1$                             | -0.002        | -0.008      | -0.032 | 0.029 | 0.915           |
| Education University vs High school or less               | -0.002        | -0.014      | -0.027 | 0.022 | 0.846           |
| <b>Head circumference-for-age</b>                         |               |             |        |       |                 |
| PFOA High vs Low <sup>a</sup>                             | -0.003        | -0.031      | -0.016 | 0.010 | 0.659           |
| Age $\geq 30$ vs <30 years                                | 0.009         | 0.095       | -0.005 | 0.022 | 0.197           |
| Multiparous vs Primiparous                                | 0.022         | 0.230       | 0.007  | 0.037 | 0.004           |

|                                                           |        |        |        |       |       |
|-----------------------------------------------------------|--------|--------|--------|-------|-------|
| Pre-pregnancy BMI $\geq 25$ vs $< 25$ kg/m <sup>2</sup>   | 0.008  | 0.083  | -0.007 | 0.023 | 0.280 |
| GWG <sup>c</sup>                                          | -0.002 | -0.033 | -0.010 | 0.007 | 0.662 |
| Pregnancy weight loss from restrictive diet Yes vs No     | 0.007  | 0.038  | -0.021 | 0.035 | 0.616 |
| Pre-pregnancy weight loss from restrictive diet Yes vs No | -0.009 | -0.078 | -0.026 | 0.008 | 0.310 |
| Passive smoking Yes vs No                                 | 0.009  | 0.080  | -0.006 | 0.024 | 0.255 |
| Smoking Yes vs Non                                        | -0.004 | -0.045 | -0.017 | 0.009 | 0.524 |
| Gestational age (In weeks)                                | 0.009  | 0.213  | 0.003  | 0.015 | 0.004 |
| Crowding index $> 1$ vs $\leq 1$                          | -0.015 | -0.129 | -0.032 | 0.002 | 0.075 |
| Education University vs High school or less               | 0.013  | 0.140  | 0.000  | 0.027 | 0.058 |

BMI : Body mass index; Unst.  $\beta$ : Unstandardized Beta; St.  $\beta$ : Standardized Beta; CI: Confidence Interval; LB: Lower Bound; UB: Upper Bound; GWG: Gestational Weight Gain

Test: Linear Regression;  $p \leq 0.05$  was considered significant

<sup>a</sup>Cut-offs of PFOA were determined according to distribution

<sup>b</sup>Variables included as predictors were age, parity, Pre-pregnancy BMI, GWG, Pre-pregnancy and Pregnancy weight loss from restrictive diet, crowding index, education, smoking, and passive smoking

<sup>c</sup>GWG was categorized according to Institute of Medicine recommendations (IOM) (IOM and NRC, 2009)



**Table S14.** Multivariate Linear Regression for Z scores of newborns anthropometric measurements at birth with PFHxS as predictor (n=243)

|                                                           | CI 95%        |             |        |       |                 |
|-----------------------------------------------------------|---------------|-------------|--------|-------|-----------------|
|                                                           | Unst. $\beta$ | St. $\beta$ | LB     | UB    | <i>p</i> -value |
| <b>Weight-for-age</b>                                     |               |             |        |       |                 |
| PFHxS High vs Low <sup>a</sup>                            | -0.010        | -0.035      | -0.044 | 0.025 | 0.584           |
| Age $\geq 30$ vs <30 years                                | 0.016         | 0.059       | -0.019 | 0.050 | 0.372           |
| Multiparous vs Primiparous                                | 0.015         | 0.054       | -0.024 | 0.054 | 0.451           |
| Pre-pregnancy BMI $\geq 25$ vs <25 kg/m <sup>2</sup>      | -0.006        | -0.022      | -0.043 | 0.031 | 0.745           |
| GWG <sup>c</sup>                                          | 0.022         | 0.135       | 0.001  | 0.043 | 0.043           |
| Pregnancy weight loss from restrictive diet Yes vs No     | 0.031         | 0.052       | -0.047 | 0.108 | 0.433           |
| Pre-pregnancy weight loss from restrictive diet Yes vs No | 0.001         | 0.004       | -0.041 | 0.044 | 0.947           |
| Passive smoking Yes vs No                                 | 0.002         | 0.008       | -0.038 | 0.043 | 0.907           |
| Smoking Yes vs Non                                        | -0.011        | -0.042      | -0.046 | 0.023 | 0.517           |
| Gestational age (In weeks)                                | 0.022         | 0.217       | 0.009  | 0.036 | 0.001           |
| Crowding index >1 vs $\leq 1$                             | -0.021        | -0.063      | -0.065 | 0.023 | 0.341           |
| Education University vs High school or less               | 0.022         | 0.079       | -0.015 | 0.058 | 0.243           |
| <b>Length-for-age</b>                                     |               |             |        |       |                 |
| PFHxS High vs Low <sup>a</sup>                            | -0.009        | -0.053      | -0.032 | 0.014 | 0.453           |
| Age $\geq 30$ vs <30 years                                | 0.016         | 0.099       | -0.007 | 0.040 | 0.179           |
| Multiparous vs Primiparous                                | 0.011         | 0.067       | -0.015 | 0.037 | 0.400           |
| Pre-pregnancy BMI $\geq 25$ vs <25 kg/m <sup>2</sup>      | -0.004        | -0.026      | -0.030 | 0.021 | 0.735           |
| GWG <sup>c</sup>                                          | -0.002        | -0.020      | -0.017 | 0.013 | 0.797           |
| Pregnancy weight loss from restrictive diet Yes vs No     | -0.009        | -0.027      | -0.060 | 0.042 | 0.721           |
| Pre-pregnancy weight loss from restrictive diet Yes vs No | 0.016         | 0.083       | -0.013 | 0.046 | 0.276           |
| Passive smoking Yes vs No                                 | 0.020         | 0.099       | -0.008 | 0.047 | 0.158           |
| Smoking Yes vs Non                                        | 0.001         | 0.007       | -0.022 | 0.024 | 0.924           |
| Gestational age (In weeks)                                | 0.001         | 0.011       | -0.010 | 0.011 | 0.884           |
| Crowding index >1 vs $\leq 1$                             | -0.002        | -0.008      | -0.032 | 0.029 | 0.913           |
| Education University vs High school or less               | -0.002        | -0.015      | -0.027 | 0.022 | 0.843           |
| <b>Head circumference-for-age</b>                         |               |             |        |       |                 |
| PFHxS High vs Low <sup>a</sup>                            | -0.002        | -0.024      | -0.015 | 0.011 | 0.739           |
| Age $\geq 30$ vs <30 years                                | 0.009         | 0.095       | -0.005 | 0.022 | 0.196           |
| Multiparous vs Primiparous                                | 0.022         | 0.230       | 0.007  | 0.037 | 0.004           |

|                                                           |        |        |        |       |       |
|-----------------------------------------------------------|--------|--------|--------|-------|-------|
| Pre-pregnancy BMI $\geq 25$ vs $< 25$ kg/m <sup>2</sup>   | 0.008  | 0.084  | -0.007 | 0.023 | 0.276 |
| GWG <sup>c</sup>                                          | -0.002 | -0.034 | -0.010 | 0.007 | 0.658 |
| Pregnancy weight loss from restrictive diet Yes vs No     | 0.007  | 0.039  | -0.021 | 0.036 | 0.604 |
| Pre-pregnancy weight loss from restrictive diet Yes vs No | -0.009 | -0.078 | -0.026 | 0.008 | 0.308 |
| Passive smoking Yes vs No                                 | 0.009  | 0.079  | -0.007 | 0.024 | 0.259 |
| Smoking Yes vs Non                                        | -0.004 | -0.044 | -0.017 | 0.009 | 0.532 |
| Gestational age (In weeks)                                | 0.009  | 0.214  | 0.003  | 0.015 | 0.004 |
| Crowding index $> 1$ vs $\leq 1$                          | -0.015 | -0.129 | -0.032 | 0.002 | 0.076 |
| Education University vs High school or less               | 0.013  | 0.139  | -0.001 | 0.027 | 0.060 |

BMI : Body mass index; Unst.  $\beta$ : Unstandardized Beta; St.  $\beta$ : Standardized Beta; CI: Confidence Interval; LB: Lower Bound; UB: Upper Bound; GWG: Gestational Weight Gain

Test: Linear Regression;  $p \leq 0.05$  was considered significant

<sup>a</sup>Cut-offs of PFHxS were determined according to distribution

<sup>b</sup>Variables included as predictors were age, parity, Pre-pregnancy BMI, GWG, Pre-pregnancy and Pregnancy weight loss from restrictive diet, crowding index, education, smoking, and passive smoking

<sup>c</sup>GWG was categorized according to Institute of Medicine recommendations (IOM) (IOM and NRC, 2009)

**Table S15.** Multivariate Linear Regression for Z scores of newborns anthropometric measurements at birth with PFOS as predictor (n=243)

|                                                           | CI 95%        |             |        |       |                 |
|-----------------------------------------------------------|---------------|-------------|--------|-------|-----------------|
|                                                           | Unst. $\beta$ | St. $\beta$ | LB     | UB    | <i>p</i> -value |
| <b>Weight-for-age</b>                                     |               |             |        |       |                 |
| PFOS High vs Low <sup>a</sup>                             | -0.009        | -0.032      | -0.044 | 0.026 | 0.617           |
| Age $\geq 30$ vs <30 years                                | 0.016         | 0.059       | -0.019 | 0.050 | 0.371           |
| Multiparous vs Primiparous                                | 0.015         | 0.053       | -0.024 | 0.054 | 0.453           |
| Pre-pregnancy BMI $\geq 25$ vs <25 kg/m <sup>2</sup>      | -0.006        | -0.023      | -0.043 | 0.031 | 0.738           |
| GWG <sup>c</sup>                                          | 0.022         | 0.135       | 0.001  | 0.043 | 0.043           |
| Pregnancy weight loss from restrictive diet Yes vs No     | 0.032         | 0.053       | -0.046 | 0.109 | 0.421           |
| Pre-pregnancy weight loss from restrictive diet Yes vs No | 0.001         | 0.004       | -0.041 | 0.044 | 0.955           |
| Passive smoking Yes vs No                                 | 0.002         | 0.008       | -0.038 | 0.043 | 0.906           |
| Smoking Yes vs Non                                        | -0.012        | -0.043      | -0.047 | 0.023 | 0.508           |
| Gestational age (In weeks)                                | 0.022         | 0.217       | 0.009  | 0.036 | 0.001           |
| Crowding index >1 vs $\leq 1$                             | -0.021        | -0.062      | -0.065 | 0.023 | 0.343           |
| Education University vs High school or less               | 0.022         | 0.079       | -0.015 | 0.058 | 0.246           |
| <b>Length-for-age</b>                                     |               |             |        |       |                 |
| PFOS High vs Low <sup>a</sup>                             | -0.009        | -0.057      | -0.033 | 0.014 | 0.421           |
| Age $\geq 30$ vs <30 years                                | 0.016         | 0.099       | -0.008 | 0.040 | 0.180           |
| Multiparous vs Primiparous                                | 0.011         | 0.067       | -0.015 | 0.037 | 0.401           |
| Pre-pregnancy BMI $\geq 25$ vs <25 kg/m <sup>2</sup>      | -0.005        | -0.027      | -0.030 | 0.021 | 0.728           |
| GWG <sup>c</sup>                                          | -0.002        | -0.020      | -0.017 | 0.013 | 0.795           |
| Pregnancy weight loss from restrictive diet Yes vs No     | -0.009        | -0.027      | -0.060 | 0.042 | 0.717           |
| Pre-pregnancy weight loss from restrictive diet Yes vs No | 0.016         | 0.083       | -0.013 | 0.046 | 0.275           |
| Passive smoking Yes vs No                                 | 0.020         | 0.100       | -0.008 | 0.047 | 0.156           |
| Smoking Yes vs Non                                        | 0.001         | 0.006       | -0.022 | 0.024 | 0.935           |
| Gestational age (In weeks)                                | 0.001         | 0.011       | -0.010 | 0.011 | 0.878           |
| Crowding index >1 vs $\leq 1$                             | -0.002        | -0.008      | -0.032 | 0.029 | 0.917           |
| Education University vs High school or less               | -0.003        | -0.015      | -0.027 | 0.022 | 0.838           |
| <b>Head circumference-for-age</b>                         |               |             |        |       |                 |
| PFOS High vs Low <sup>a</sup>                             | -0.002        | -0.025      | -0.016 | 0.011 | 0.723           |
| Age $\geq 30$ vs <30 years                                | 0.009         | 0.095       | -0.005 | 0.022 | 0.196           |
| Multiparous vs Primiparous                                | 0.022         | 0.230       | 0.007  | 0.037 | 0.004           |

|                                                           |        |        |        |       |       |
|-----------------------------------------------------------|--------|--------|--------|-------|-------|
| Pre-pregnancy BMI $\geq 25$ vs $< 25$ kg/m <sup>2</sup>   | 0.008  | 0.084  | -0.007 | 0.023 | 0.278 |
| GWG <sup>c</sup>                                          | -0.002 | -0.034 | -0.010 | 0.007 | 0.657 |
| Pregnancy weight loss from restrictive diet Yes vs No     | 0.007  | 0.039  | -0.021 | 0.036 | 0.603 |
| Pre-pregnancy weight loss from restrictive diet Yes vs No | -0.009 | -0.078 | -0.026 | 0.008 | 0.308 |
| Passive smoking Yes vs No                                 | 0.009  | 0.079  | -0.007 | 0.024 | 0.258 |
| Smoking Yes vs Non                                        | -0.004 | -0.044 | -0.017 | 0.009 | 0.527 |
| Gestational age (In weeks)                                | 0.009  | 0.214  | 0.003  | 0.015 | 0.004 |
| Crowding index $> 1$ vs $\leq 1$                          | -0.015 | -0.129 | -0.032 | 0.002 | 0.076 |
| Education University vs High school or less               | 0.013  | 0.138  | -0.001 | 0.027 | 0.060 |

BMI : Body mass index; Unst.  $\beta$ : Unstandardized Beta; St.  $\beta$ : Standardized Beta; CI: Confidence Interval; LB: Lower Bound; UB: Upper Bound; GWG: Gestational Weight Gain

Test: Linear Regression;  $p \leq 0.05$  was considered significant

<sup>a</sup>Cut-offs of PFOS were determined according to distribution

<sup>b</sup>Variables included as predictors were age, parity, Pre-pregnancy BMI, GWG, Pre-pregnancy and Pregnancy weight loss from restrictive diet, crowding index, education, smoking, and passive smoking

<sup>c</sup>GWG was categorized according to Institute of Medicine recommendations (IOM) (IOM and NRC, 2009)

**Table S16.** Multivariate Linear Regression for Z scores of newborns anthropometric measurements at birth with  $\Sigma$ PFAS as predictor (n=243)

|                                                           | CI 95%        |             |        |       |                 |
|-----------------------------------------------------------|---------------|-------------|--------|-------|-----------------|
|                                                           | Unst. $\beta$ | St. $\beta$ | LB     | UB    | <i>p</i> -value |
| <b>Weight-for-age</b>                                     |               |             |        |       |                 |
| $\Sigma$ PFAS High vs Low <sup>a</sup>                    | -0.009        | -0.032      | -0.044 | 0.026 | 0.617           |
| Age $\geq 30$ vs <30 years                                | 0.016         | 0.059       | -0.019 | 0.050 | 0.371           |
| Multiparous vs Primiparous                                | 0.015         | 0.053       | -0.024 | 0.054 | 0.453           |
| Pre-pregnancy BMI $\geq 25$ vs <25 kg/m <sup>2</sup>      | -0.006        | -0.023      | -0.043 | 0.031 | 0.738           |
| GWG <sup>c</sup>                                          | 0.022         | 0.135       | 0.001  | 0.043 | 0.043           |
| Pregnancy weight loss from restrictive diet Yes vs No     | 0.032         | 0.053       | -0.046 | 0.109 | 0.421           |
| Pre-pregnancy weight loss from restrictive diet Yes vs No | 0.001         | 0.004       | -0.041 | 0.044 | 0.955           |
| Passive smoking Yes vs No                                 | 0.002         | 0.008       | -0.038 | 0.043 | 0.906           |
| Smoking Yes vs Non                                        | -0.012        | -0.043      | -0.047 | 0.023 | 0.508           |
| Gestational age (In weeks)                                | 0.022         | 0.217       | 0.009  | 0.036 | 0.001           |
| Crowding index >1 vs $\leq 1$                             | -0.021        | -0.062      | -0.065 | 0.023 | 0.343           |
| Education University vs High school or less               | 0.022         | 0.079       | -0.015 | 0.058 | 0.246           |
| <b>Length-for-age</b>                                     |               |             |        |       |                 |
| $\Sigma$ PFAS High vs Low <sup>a</sup>                    | -0.009        | -0.057      | -0.033 | 0.014 | 0.421           |
| Age $\geq 30$ vs <30 years                                | 0.016         | 0.099       | -0.008 | 0.040 | 0.180           |
| Multiparous vs Primiparous                                | 0.011         | 0.067       | -0.015 | 0.037 | 0.401           |
| Pre-pregnancy BMI $\geq 25$ vs <25 kg/m <sup>2</sup>      | -0.005        | -0.027      | -0.030 | 0.021 | 0.728           |
| GWG <sup>c</sup>                                          | -0.002        | -0.020      | -0.017 | 0.013 | 0.795           |
| Pregnancy weight loss from restrictive diet Yes vs No     | -0.009        | -0.027      | -0.060 | 0.042 | 0.717           |
| Pre-pregnancy weight loss from restrictive diet Yes vs No | 0.016         | 0.083       | -0.013 | 0.046 | 0.275           |
| Passive smoking Yes vs No                                 | 0.020         | 0.100       | -0.008 | 0.047 | 0.156           |
| Smoking Yes vs Non                                        | 0.001         | 0.006       | -0.022 | 0.024 | 0.935           |
| Gestational age (In weeks)                                | 0.001         | 0.011       | -0.010 | 0.011 | 0.878           |
| Crowding index >1 vs $\leq 1$                             | -0.002        | -0.008      | -0.032 | 0.029 | 0.917           |
| Education University vs High school or less               | -0.003        | -0.015      | -0.027 | 0.022 | 0.838           |
| <b>Head circumference-for-age</b>                         |               |             |        |       |                 |
| $\Sigma$ PFAS High vs Low <sup>a</sup>                    | -0.002        | -0.025      | -0.016 | 0.011 | 0.723           |
| Age $\geq 30$ vs <30 years                                | 0.009         | 0.095       | -0.005 | 0.022 | 0.196           |
| Multiparous vs Primiparous                                | 0.022         | 0.230       | 0.007  | 0.037 | 0.004           |

|                                                           |        |        |        |       |       |
|-----------------------------------------------------------|--------|--------|--------|-------|-------|
| Pre-pregnancy BMI $\geq 25$ vs $< 25$ kg/m <sup>2</sup>   | 0.008  | 0.084  | -0.007 | 0.023 | 0.278 |
| GWG <sup>c</sup>                                          | -0.002 | -0.034 | -0.010 | 0.007 | 0.657 |
| Pregnancy weight loss from restrictive diet Yes vs No     | 0.007  | 0.039  | -0.021 | 0.036 | 0.603 |
| Pre-pregnancy weight loss from restrictive diet Yes vs No | -0.009 | -0.078 | -0.026 | 0.008 | 0.308 |
| Passive smoking Yes vs No                                 | 0.009  | 0.079  | -0.007 | 0.024 | 0.258 |
| Smoking Yes vs Non                                        | -0.004 | -0.044 | -0.017 | 0.009 | 0.527 |
| Gestational age (In weeks)                                | 0.009  | 0.214  | 0.003  | 0.015 | 0.004 |
| Crowding index $> 1$ vs $\leq 1$                          | -0.015 | -0.129 | -0.032 | 0.002 | 0.076 |
| Education University vs High school or less               | 0.013  | 0.138  | -0.001 | 0.027 | 0.060 |

BMI : Body mass index; Unst.  $\beta$ : Unstandardized Beta; St.  $\beta$ : Standardized Beta; CI: Confidence Interval; LB: Lower Bound; UB: Upper Bound; GWG: Gestational Weight Gain

Test: Linear Regression;  $p \leq 0.05$  was considered significant

<sup>a</sup>Cut-offs of  $\sum$ PFAS were determined according to distribution

<sup>b</sup>Variables included as predictors were age, parity, Pre-pregnancy BMI, GWG, Pre-pregnancy and Pregnancy weight loss from restrictive diet, crowding index, education, smoking, and passive smoking

<sup>c</sup>GWG was categorized according to Institute of Medicine recommendations (IOM) (IOM and NRC, 2009)
